1 Polysaccharide breakdown products drive degradation-dispersal cycles of  
2 foraging bacteria through changes in metabolism and motility

3

4

5 Astrid KM Stubbusch<sup>1,2,3</sup>, Johannes M. Keestra<sup>4</sup>, Julia Schwartzman<sup>5,6</sup>, Sammy Pontrelli<sup>7</sup>, Estelle E.

6 Clerc<sup>4</sup>, Roman Stocker<sup>4</sup>, Cara Magnabosco<sup>3</sup>, Olga T. Schubert<sup>1,2</sup>, Martin Ackermann<sup>1,2,8</sup>, Glen G

7 D'Souza<sup>1,2</sup>

8 <sup>1</sup>Institute of Biogeochemistry and Pollutant Dynamics, Department of Environmental Systems  
9 Science, ETH Zurich, Zurich, Switzerland

10 <sup>2</sup>Department of Environmental Microbiology, Eawag: Swiss Federal Institute of Aquatic Science and  
11 Technology, Duebendorf, Switzerland

12 <sup>3</sup>Geological Institute, Department of Earth Sciences, ETH Zurich, Zurich, Switzerland

13 <sup>4</sup>Institute of Environmental Engineering, Department of Civil, Environmental and Geomatic  
14 Engineering, ETH Zurich, Zurich, Switzerland

15 <sup>5</sup>Department of Civil and Environmental Engineering, MIT, Cambridge, MA, USA

16 <sup>6</sup>Department of Biology, University of Southern California, Los Angeles, USA

17 <sup>7</sup>Institute of Molecular Systems Biology, Department of Biology, ETH Zurich, Zurich, Switzerland

18 <sup>8</sup>Laboratory of Microbial Systems Ecology, School of Architecture, Civil and Environmental  
19 Engineering (ENAC), École Polytechnique Fédéral de Lausanne (EPFL), Lausanne, Switzerland

20

21 **ORCID:**

22 GD: 0000-0002-9123-101X

23 AS: 0000-0003-4767-2712

24 JK: 0000-0002-8877-4881

25 JS: 0000-0003-4563-4835

26 EC: 0009-0003-6046-2856

27 SP: 0000-0001-6265-8842

28 RS: 0000-0002-3199-0508

29 CM: 0000-0001-6871-7188

30 MA: 0000-0003-0087-4819

31 OS: 0000-0002-2613-0714

32

33 **Corresponding authors:** Glen G D'Souza and Astrid KM Stubbusch

34 Address: Eawag, Ueberlandstrasse 133, 8600 Duebendorf, Switzerland

35 Email: [glengeralddsouza@gmail.com](mailto:glengeralddsouza@gmail.com), [astubbusch@icloud.com](mailto:astubbusch@icloud.com)

36 Phone: +41-58-765-5495

37

38

39 **Keywords:** cooperative polysaccharide degradation, colony formation, cell dispersal, glycan,

40 alginate, exoenzymes, alginate lyases, *Vibrio cyclitrophicus* ZF270

## 41 **Abstract**

42 Most of Earth's biomass is composed of polysaccharides. During biomass decomposition,  
43 polysaccharides are degraded by heterotrophic bacteria as a nutrient and energy source and are thereby  
44 partly remineralized into CO<sub>2</sub>. As polysaccharides are heterogeneously distributed in nature, following  
45 the colonization and degradation of a polysaccharide hotspot the cells need to reach new polysaccharide  
46 hotspots. Even though these degradation-dispersal cycles are an integral part in the global carbon cycle,  
47 we know little about how cells alternate between degradation and motility, and which environmental  
48 factors trigger this behavioral switch. Here, we studied the growth of the marine bacterium *Vibrio*  
49 *cyclitrophicus* ZF270 on the abundant marine polysaccharide alginate. We used microfluidics-coupled  
50 time-lapse microscopy to analyze motility and growth of individual cells, and RNA sequencing to study  
51 associated changes in gene expression. Single cells grow at reduced rate on alginate until they form  
52 large groups that cooperatively break down the polymer. Exposing cell groups to digested alginate  
53 accelerates cell growth and changes the expression of genes involved in alginate degradation and  
54 catabolism, central metabolism, ribosomal biosynthesis, and transport. However, exposure to digested  
55 alginate also triggers cells to become motile and disperse from cell groups, proportionally increasing  
56 with the group size before the nutrient switch, accompanied by high expression of genes involved in  
57 flagellar assembly, chemotaxis, and quorum sensing. The motile cells chemotax toward alginate  
58 hotspots, likely enabling cells to find new polysaccharide hotspots. Overall, our findings reveal the  
59 cellular mechanisms underlying bacterial degradation-dispersal cycles that drive remineralization in  
60 natural environments.

61

## 62 **Importance**

63 Polysaccharides, also known as glycans, are the most abundant form of biomass on Earth and  
64 understanding how they are degraded by microorganisms is essential for our understanding of the global  
65 carbon cycle and the storage and release of CO<sub>2</sub> by natural systems. Although group formation is a  
66 common strategy used by bacterial cells to degrade ubiquitous polymeric growth substrates in nature,  
67 where nutrient hotspots are heterogeneously distributed, little is known about how cells prepare for  
68 dispersal from an exhausted nutrient source and re-initiate degradation of new nutrient patches. By

69 quantifying growth, motility and chemotaxis of individual cells and comparing gene expression changes  
70 when populations were exposed to either polysaccharides or their degradation products in the form of  
71 digested polysaccharides, we show that bacterial cells alter their behavior when they experience a shift  
72 from polymeric to digested polysaccharides: After cells form groups during growth on polymers, the  
73 exposure to degradation products made cells motile, enabling dispersal from sessile cell groups and -  
74 guided by chemotaxis - movement towards new polysaccharide hotspots. Our study sheds light on the  
75 cellular processes that drive bacterial growth and behavior during carbon remineralization, an important  
76 driver of CO<sub>2</sub> release from biomass in natural systems.

77

## 78 **Introduction**

79 Polysaccharides represent the largest fraction of biomass on Earth<sup>1,2</sup> and are constantly degraded and  
80 remineralized by microorganisms. Polysaccharides, also known as glycans, are long chains of  
81 monosaccharide units produced by cells for structural support (e.g., cellulose, chitin, and alginate) or  
82 energy storage (e.g., starch or glycogen)<sup>1</sup>. Heterotrophic microbes obtain nutrients and energy from the  
83 polysaccharide breakdown products. They often use exoenzymes, either secreted or anchored in the cell  
84 membrane<sup>2,3</sup>, to cleave these large polymers into smaller units that can be taken up by cells. The  
85 formation of dense cell groups is observed during growth on polysaccharides by diverse bacteria,  
86 including the soil- and gut-dwelling *Bacillus subtilis*<sup>3</sup>, the oligotrophic fresh-water *Caulobacter*  
87 *crescentus*<sup>4</sup>, and several representatives of the copiotrophic<sup>5,6</sup> marine *Vibrio spp.*<sup>7,8</sup>. It has been  
88 suggested that "cooperative" growth<sup>3</sup>, where dense cell groups reduce diffusional loss of valuable  
89 degradation products and secreted exoenzymes, represents a general principle in polysaccharide  
90 degradation<sup>4,8</sup>. Yet, how bacteria subsequently disperse from exhausted polysaccharide sources and  
91 navigate towards new polysaccharide hotspots remains poorly understood.

92

93 To study the cellular mechanisms that govern the switch between polysaccharide degradation and  
94 dispersal toward new polysaccharide hotspots, we worked with the ubiquitous marine  
95 Gammaproteobacterium *Vibrio cyclitrophicus* ZF270, a degrader of the prevalent marine  
96 polysaccharide alginate<sup>6,9</sup>. Alginate is a linear polysaccharide that is produced by brown algae as a cell

97 wall component, as well as by certain bacteria<sup>10</sup>. It can be cleaved into oligomers by endo-acting alginate  
98 lyases or into monomers by exo-acting alginate lyases (alginate lyases reviewed here<sup>11</sup>), namely  $\beta$ -D-  
99 mannuronic acid and  $\alpha$ -L-guluronic acid<sup>10</sup>. *V. cyclitrophicus* ZF270 is found predominantly in the large-  
100 particle fractions of coastal water<sup>12</sup>, can attach and form biofilms on the surfaces of multiple  
101 polysaccharides including alginate<sup>13</sup>, and was shown to secrete alginate lyases during alginate  
102 degradation<sup>8</sup>. In this study, we used microfluidics coupled to automated time-lapse imaging to quantify  
103 the growth dynamics, group formation, and motility of *V. cyclitrophicus* ZF270 at the single-cell level  
104 under constant supply of either polymeric alginate or alginate degradation product in the form of  
105 digested alginate, as well as upon a transition from alginate to digested alginate. Furthermore, we used  
106 RNA-sequencing to compare the gene expression of *V. cyclitrophicus* ZF270 grown on alginate and  
107 digested alginate. We found striking responses to the form of alginate in growth rate, group formation,  
108 motility and chemotaxis, as well as in the expression of corresponding genes. Overall, our work  
109 provides insights into the metabolic and cellular regulation that allows cells to forage in heterogeneous  
110 nutrient-scapes through degradation-dispersal cycles.

111

## 112 **Results**

### 113 **Extracellular break down of alginate delays population growth**

114 To probe the phenotypic and metabolic regulation of bacterial cells during the progressive degradation  
115 of a polysaccharide source, we developed an experimental system consisting of the marine bacterium  
116 *V. cyclitrophicus* ZF270 growing on alginate, a highly abundant polysaccharide in the ocean. To mimic  
117 the local nutrient environment during the colonization of a new polysaccharide source, we used 0.1%  
118 weight per volume (w/v) algae-derived alginate in its soluble form (in the following also simply referred  
119 to as "alginate"). Since commercially available alginate breakdown products of specific sizes are limited  
120 and expensive, with only one monomeric component available at a considerable cost, we simulate an  
121 advanced stage of polysaccharide degradation by supplying cells with digested alginate (0.1% (w/v)).  
122 This digested alginate is prepared by treating alginate with a readily available endo-acting alginate lyase  
123 (see Materials and Methods). This mimics an environment where degradation products like monomers  
124 and oligomers become abundant through the action of extracellular alginate lyases. The commercially

125 available alginate lyase has been shown to produce alginate oligomers of progressively smaller size  
126 over extended digestion periods<sup>14,15</sup>. We used Liquid Chromatography-Mass Spectrometry (LC-MS) to  
127 analyze the composition of the digested alginate, which had been subject to 48 hours of digestion. We  
128 found that digested alginate contained more monosaccharides than untreated alginate, which contained  
129 more alginate molecules of higher molecular weight (Fig. S1).

130

131 Using this system, we first set out to investigate the growth dynamics of *V. cyclitrophicus* ZF270 in  
132 well-mixed batch cultures containing either alginate or digested alginate as a sole carbon source (Fig.  
133 S2A). We found that similar yields were reached in the alginate and digested alginate cultures as  
134 indicated by optical density (Fig. S2B and C) and confirmed by colony counts (Fig. S3), suggesting that  
135 the same amount of alginate supports a similar yield irrespective of its degree of depolymerization.  
136 However, the onset of growth on alginate was delayed by about 7.5 hours compared to growth on  
137 digested alginate (Fig. S2D and E). This is consistent with previous observations that in well-mixed  
138 environments the lag time of bacteria growing on alginate can be reduced by the external  
139 supplementation of alginate lyases<sup>8,14</sup>. Together, these findings indicate that growth on polysaccharides  
140 such as alginate in well-mixed cultures is initially limited by the extracellular breakdown of the  
141 polysaccharide.

142

### 143 **Large cell groups form on alginate but not on digested alginate**

144 To better understand how cells react to the changing degree of depolymerization of a polysaccharide  
145 source during degradation, we investigated the growth of *V. cyclitrophicus* ZF270 at the level of single  
146 cells on alginate and digested alginate. For this purpose, we grew the cells in microfluidic growth  
147 chambers, described in detail by Dal Co et al.<sup>16</sup>, where cells were provided with a continuous flow of  
148 culture media containing either alginate or digested alginate as carbon source. We found that over 24  
149 hours dense groups of more than 1000 cells formed on alginate, filling the entire microfluidic chamber  
150 (Fig. 1A). In contrast, cells supplied with digested alginate grew in smaller groups that never exceeded  
151 100 cells per chamber (Fig. 1B and C). Reconstructed cell lineages revealed that the large cell groups  
152 on alginate formed because cells often did not disperse after division and thereby formed dense cell

153 groups originating from a single cell lineage (Fig. 1A). The lower cell density on digested alginate could  
154 be caused by slower growth or by more cells leaving the chambers. As the maximum growth rate both  
155 in bulk and on single cell level is similar in alginate and digested alginate (Fig. S2E and F), it is most  
156 likely that the lower cell density in digested alginate is caused by cell dispersal. These observations  
157 suggest that cells can modulate their propensity to form groups depending on the state of polysaccharide  
158 degradation in their local environment. Similar observations were made with a different model system  
159 (*Caulobacter crescentus* growing on the polysaccharide xylan)<sup>14</sup>, indicating that group formation on  
160 polymeric nutrient sources may be a general mechanism of bacteria that degrade polysaccharides  
161 extracellularly.  
162

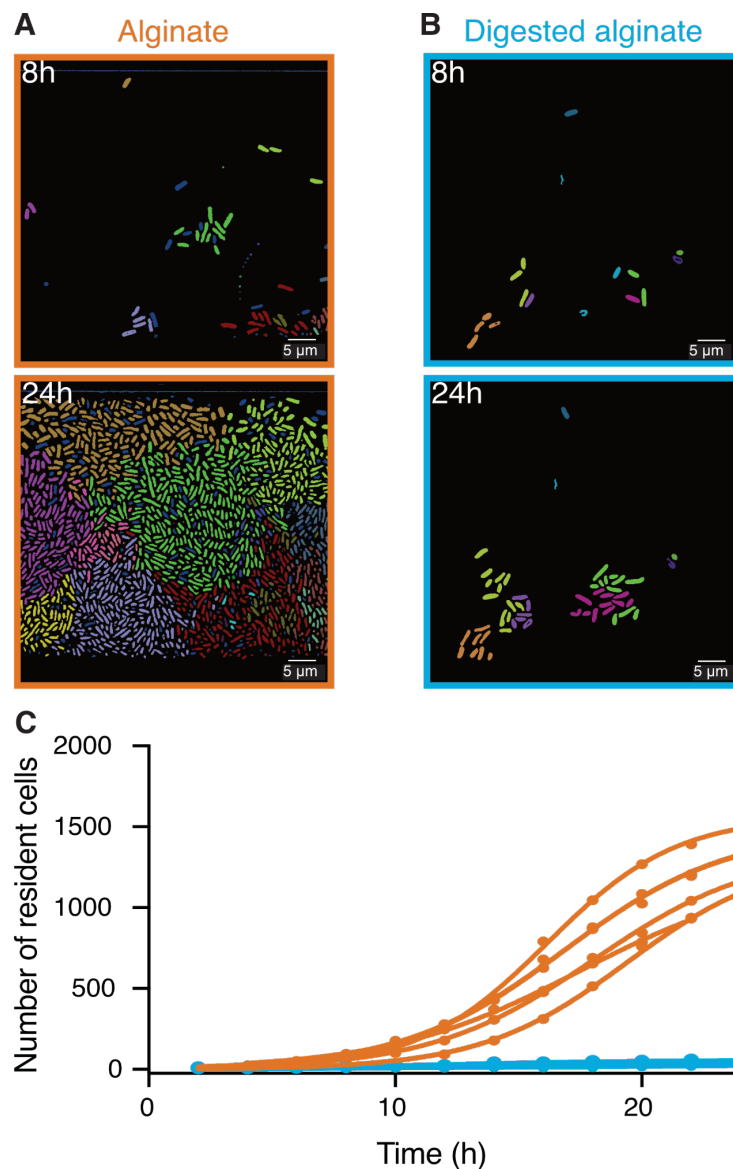

163

164 **Figure 1. Large cell groups form on alginate but not on digested alginate.** Representative images at different  
165 time points of *V. cyclitrophicus* ZF270 cells growing in microfluidic chambers, described in detail by Dal Co et  
166 al.<sup>16</sup>, with (A) alginate medium or (B) digested alginate medium, both in their soluble form (not visible). Cells are  
167 false-colored according to their lineage identities based on cell segmentation and tracking over 24 hours. Cells  
168 without identified progenitors are colored in dark blue. See Supplemental Videos S1 (alginate) and S2 (digested  
169 alginate) for time-lapse videos. (C) Cell numbers within microfluidic chambers supplied with alginate (orange)  
170 are substantially higher than cell numbers within microfluidic chambers supplied with digested alginate (blue)  
171 (Logistic growth regression for alginate:  $R^2 = 0.99$ , maximal number of cells = 1217-1564,  $k = 0.24-0.38 \text{ h}^{-1}$ ; for  
172 digested alginate:  $R^2 = 0.86-0.97$ , maximal number of cells = 47-100,  $k = 0.07-0.4 \text{ h}^{-1}$ ). Circles indicate the number  
173 of cells present at a given time point in each chamber ( $n_{\text{chambers}} = 7$ ). Data for chambers with alginate originate  
174 from D'Souza et al.<sup>8</sup>. Lines are fits of a logistic growth regression line for each condition.

175

### 176 **Transition from alginate to digested alginate triggers density-dependent dispersal of cells**

177 To investigate the transition from the large cell groups formed on alginate to the small groups formed  
178 on digested alginate, we subjected *V. cyclitrophicus* ZF270 cells grown on alginate to a switch to  
179 digested alginate (Fig. 2A). Following the limited cell motility on alginate, this switch led to a rapid  
180 decrease in cell density within the growth chambers (Fig. 2B), presumably caused by cell dispersal. As  
181 we previously reported for other *Vibrionaceae* isolates, the growth rate of the cells on alginate was  
182 dependent on the local cell density: Initially the growth rate increased with cell density but then  
183 decreased at high cell densities, indicating that cell groups can benefit from the sharing of breakdown  
184 products generated by each other's exoenzymes, but also increasingly compete for nutrients<sup>8</sup>. This led  
185 us to investigate whether cell in larger groups, potentially experiencing stronger nutrient competition,  
186 might have a higher propensity to disperse after a switch to digested alginate than cells in smaller  
187 groups. We indeed found an inverse relationship between the number of cells at the time of the nutrient  
188 switch and the following change in cell number, meaning that cells in chambers with many cells were  
189 more likely to disperse than cells in chambers with less cells (Fig. 2C). Thus, during the transition from  
190 polysaccharides to degradation products, we found that the dispersal rate of cells depends on the size of  
191 the cell groups, likely through increased motility of cells in large groups.

192

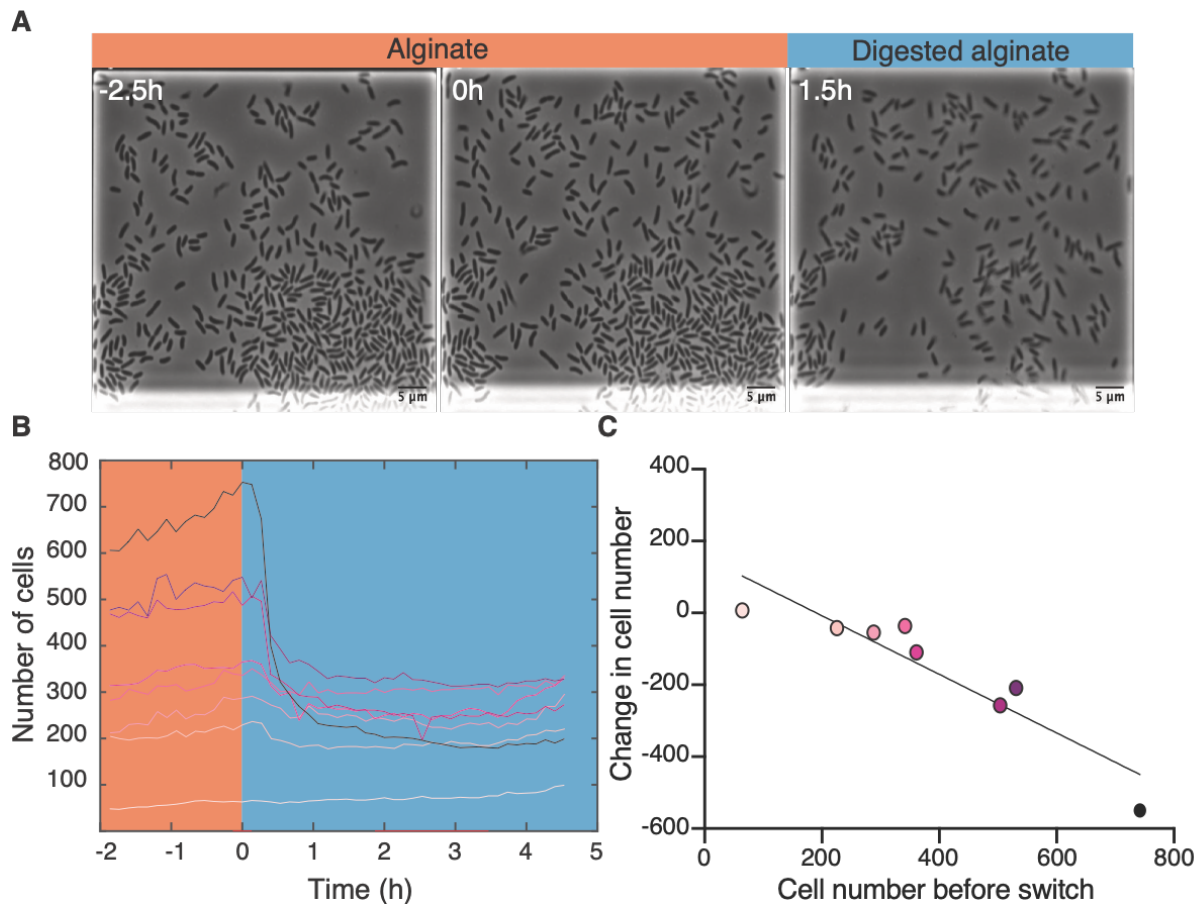

193

194 **Figure 2. Transition from alginate to digested alginate triggers density-dependent dispersal of cells.** (A)

195 Representative time-lapse images of *V. cyclitrophicus* ZF270 cells (phase contrast microscopy) in microfluidic

196 growth chambers that were initially exposed to alginate and then switched to digested alginate. (B) Number of

197 cells in different chambers over time, each chamber indicated by a unique color ( $n = 8$ ). The carbon source is

198 indicated by the colored background (orange: alginate; blue: digested alginate). See Supplemental Video 3 for a

199 time-lapse video. (C) Negative relationship between the difference in number of cells within the microfluidic

200 growth chambers before and after the nutrient switch. Each circle represents one growth chamber with colors

201 corresponding to (B), and the line depicts a linear regression fit ( $R^2 = 0.85$ , slope = -0.81,  $p$ -value < 0.001).

202

203 **Cells growing on digested alginate are more motile and chemotax towards new polysaccharide**

204 **sources**

205 To investigate whether increased cell motility of *V. cyclitrophicus* ZF270 underlies the dispersal of cells

206 observed after a shift to digested alginate, as also previously observed for *C. crescentus* cells on the

207 monosaccharide xylose<sup>4,14</sup>, we quantified the motility of single cells supplied with either alginate or

208 digested alginate. We found that the single-cell swimming speed as well as the swimming distance were



209 significantly larger for cells supplied with digested alginate compared to cells supplied with alginate,  
210 and that a larger fraction of cells was motile (Fig. 3). This confirmed increased motility as a cellular  
211 response to the exposure to degradation products in the form of digested alginate.

212

213 To understand if the motile cells are directed by chemotaxis, we measured the chemotactic strength  
214 towards alginate and digested alginate using the In Situ Chemotaxis Assay (ISCA)<sup>17,18</sup>. We found *V.*  
215 *cyclitrophicus* ZF270 to significantly chemotax toward alginate (chemotactic index  $I_c > 1$ ) but not  
216 toward digested alginate (Fig. 3F). This suggested that the increase in motility is accompanied by  
217 chemotaxis toward alginate. Overall, these findings suggest that once the breakdown of a  
218 polysaccharide source makes breakdown products available in the local environment, a fraction of cells  
219 becomes motile and disperses. These motile cells are guided by chemotaxis towards new polysaccharide  
220 sources, allowing them to start a new degradation-dispersal cycle.

221

222 **Altered gene expression in central carbon metabolism, enzyme production, secretion and**  
223 **transporters, motility, and quorum sensing underlies the late-stage alginate degradation and cell**  
224 **dispersal**

225 Next, we sought to elucidate the molecular mechanisms underlying the observed phenomenological  
226 disparities between cells cultivated on alginate and digested alginate. Due to the challenge of generating  
227 knock-out mutants in natural isolates, we used transcriptomics to investigate the differentially expressed  
228 genes of *V. cyclitrophicus* ZF270 under these respective conditions. To obtain a high-quality reference  
229 genome of *V. cyclitrophicus* ZF270, we sequenced and assembled a new reference genome using  
230 combined short and long read sequencing (BioProject PRJNA991487). We then grew cultures on either  
231 alginate or digested alginate until mid-exponential phase. To understand which cellular functions were  
232 affected by the expression changes, we first performed differential gene expression analysis using the  
233 software DESeq2. Here, genes exhibiting a log<sub>2</sub> fold expression change greater than 0.5 or smaller than  
234 -0.5 between the two conditions, with a Benjamini-Hochberg(BH)-adjusted *p*-value below 0.01, were  
235 considered to be differentially expressed (Table S1). Next, we investigated which KEGG categories

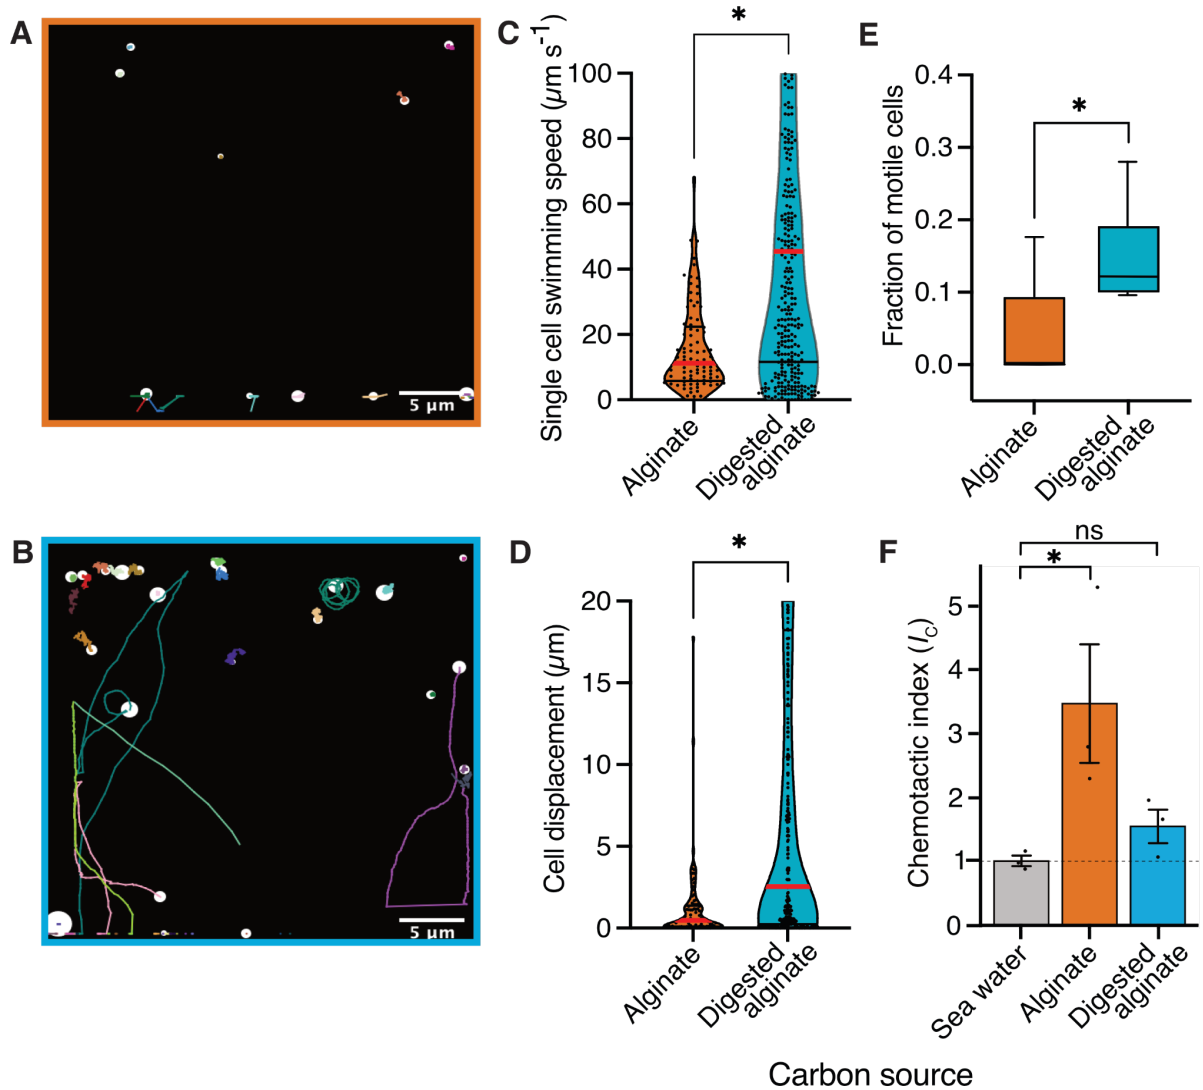

236

237 **Figure 3. Cells are more motile on digested alginate than alginate and show chemotaxis towards alginate.**

238 (A and B) Spatial trajectories of cells supplied with (A) alginate or (B) digested alginate in representative

239 microfluidic growth chambers are shown. White circles mark the starting point of each trajectory and colored

240 lines mark the individual trajectories. (C) Distributions of the mean single-cell swimming speeds (Nested t-test,

241  $p$ -value < 0.0007,  $t = 4.803$ ,  $df = 10$ ,  $n_{\text{cells}} = 86$  vs 375 in  $n_{\text{chambers}} = 5$ ) are shown. (D) Distributions of cell

242 displacement over the course of a trajectory (Nested t-test test,  $p$ -value < 0.0131,  $t = 4.39$ ,  $df = 10$ ,  $n_{\text{cells}} = 86$  vs

243 375, and  $n_{\text{chambers}} = 5$ ) are shown. In (C) and (D) the red horizontal lines indicate the mean while black lines depict

244 the 25th and 75th quartiles of the distribution. (E) The mean fraction of motile cells in each chamber, where motile

245 cells are defined as cells with displacement greater than 1  $\mu\text{m}$  (Mann-Whitney test on the means of five growth

246 chambers,  $p$ -value = 0.034). In C, D, and E, each chamber was considered as an independent replicate. (F)

247 Chemotactic index ( $I_c$ ) quantified by In Situ Chemotaxis Assay (ISCA) (Tukey multiple comparisons of means,

248 95% family-wise confidence levels as error bars,  $p$ -value < 0.05,  $n = 3$ ). Asterisks indicate statistically significant  
249 differences. See Supplemental Videos S4 and S5 for time-lapse videos of swimming cells.

250

251 were enriched in either genes with increased or decreased expression via Gene Set Enrichment Analysis  
252 (GSEA)<sup>19</sup> (Table S2) and found nine categories significantly enriched in genes with increased gene  
253 expression on digested alginate, and three categories significantly enriched in genes with decreased  
254 gene expression (Fig. 4A).

255

256 Cells growing on digested alginate showed expression changes in parts of the central metabolism and  
257 translation, compared to cells growing on alginate. Specifically, two pathways of the central metabolism  
258 were significantly enriched in genes with lower expression on digested alginate ("Valine, leucine and  
259 isoleucine biosynthesis" and "Propanoate metabolism" with a negative normalized enrichment score  
260 (NES), Fig. 4A, S4A and B, Table S3 and S4). We also found the gene set that encodes ribosomal  
261 proteins significantly enriched with genes highly expressed on digested alginate (positive NES, Fig. 4A  
262 and S4C, Table S5). This implies that cells invest proportionally more of their transcriptome into the  
263 production of new proteins, a sign of faster growth<sup>20,21</sup>. Both observations likely relate to the different  
264 growth dynamics of *V. cyclitrophicus* ZF270 on digested alginate compared to alginate.

265

266 The expression of transporters and secretion systems was generally increased in cells growing on  
267 digested alginate, compared to cells growing on alginate. This includes genes with a function in  
268 "Bacterial secretion systems", namely secretion systems I to VI, which mediate protein export through  
269 the inner and outer membranes of Gram-negative bacteria (Fig. 4A and S4D, Table S6). Notably, eleven  
270 of the thirteen General Secretion Pathway (GSP) genes (part of the type II secretion system) showed  
271 1.1 to 3.4-fold increased expression levels on digested alginate ( $p$ -values < 0.01, Fig. 4A, Table S8).

272 The GSP is known to facilitate secretion of various extracellular enzymes like chitinases, proteases, and  
273 lipases<sup>22,23</sup>, therefore, the positive enrichment on digested alginate may be linked to the export of  
274 extracellular alginate lyases. The KEGG BRITE category "Secretion system" was also enriched on  
275 digested alginate (Fig. 4A and S4D, Table S7). It contains additional genes involved in protein export,

276 of which especially genes of type IV pilus assembly, conjugal transfer pilus assembly, and MSHA pilus  
277 biogenesis were highly expressed on digested alginate, implicating them as interesting subjects to  
278 further research in their role in protein secretion and cell attachment and detachment during  
279 degradation-dispersal cycles of polysaccharide-degrading bacteria. Also, the gene set of transporters  
280 and in particular ABC transporters were positively enriched (Fig. 4A, Table S10 and S11). The latter  
281 showed enrichment especially in genes related to saccharide, iron, zinc, and phosphate transport (Fig.  
282 S4E), which suggests that cells growing on digested alginate invest proportionally more of their  
283 transcriptome into uptake of not only saccharides but also essential nutrients like iron, zinc, and  
284 phosphate, which may become growth-limiting when degradation products are abundantly available.

285  
286 Both motility and quorum sensing genes increased in expression in cells growing on digested alginate.  
287 The positive enrichment of the gene set containing bacterial motility proteins matched the increase in  
288 motile cells that we observed in Figure 3E (Fig. 4A, Table S12). The set of quorum sensing genes was  
289 also positively enriched in cells growing on digested alginate (Fig. 4A and S4F, Table S13). Quorum  
290 sensing is known to control biofilm formation in *Vibrio cholerae*<sup>24,25</sup> and may orchestrate the density-  
291 dependent dispersal in the presence of degradation products, though the particular signaling cues remain  
292 to be uncovered. The strong cellular response to the degree of alginate depolymerization was also  
293 emphasized by the finding that transcription factor genes were enriched among genes with decreased  
294 expression on digested alginate (Fig.4, Table S14). The set of genes associated to KEGG's beta-lactam  
295 resistance category was enriched in genes with increased expression on digested alginate. However,  
296 most genes in this gene set are also associated to the KEGG pathways "Transporters", "Quorum  
297 sensing", "Chromosome and associated genes", and "Peptidoglycan biosynthesis" and thus the  
298 enrichment likely reflects expression changes in these categories and may relate to the difference in  
299 growth dynamics (Fig. 4A and S4G, Table S15). Overall, the observed gene expression changes provide  
300 insights into the molecular mechanisms underlying the substantial adaptations of *V. cyclitrophicus*  
301 ZF270 cells to the polymeric and digested form of alginate.

302

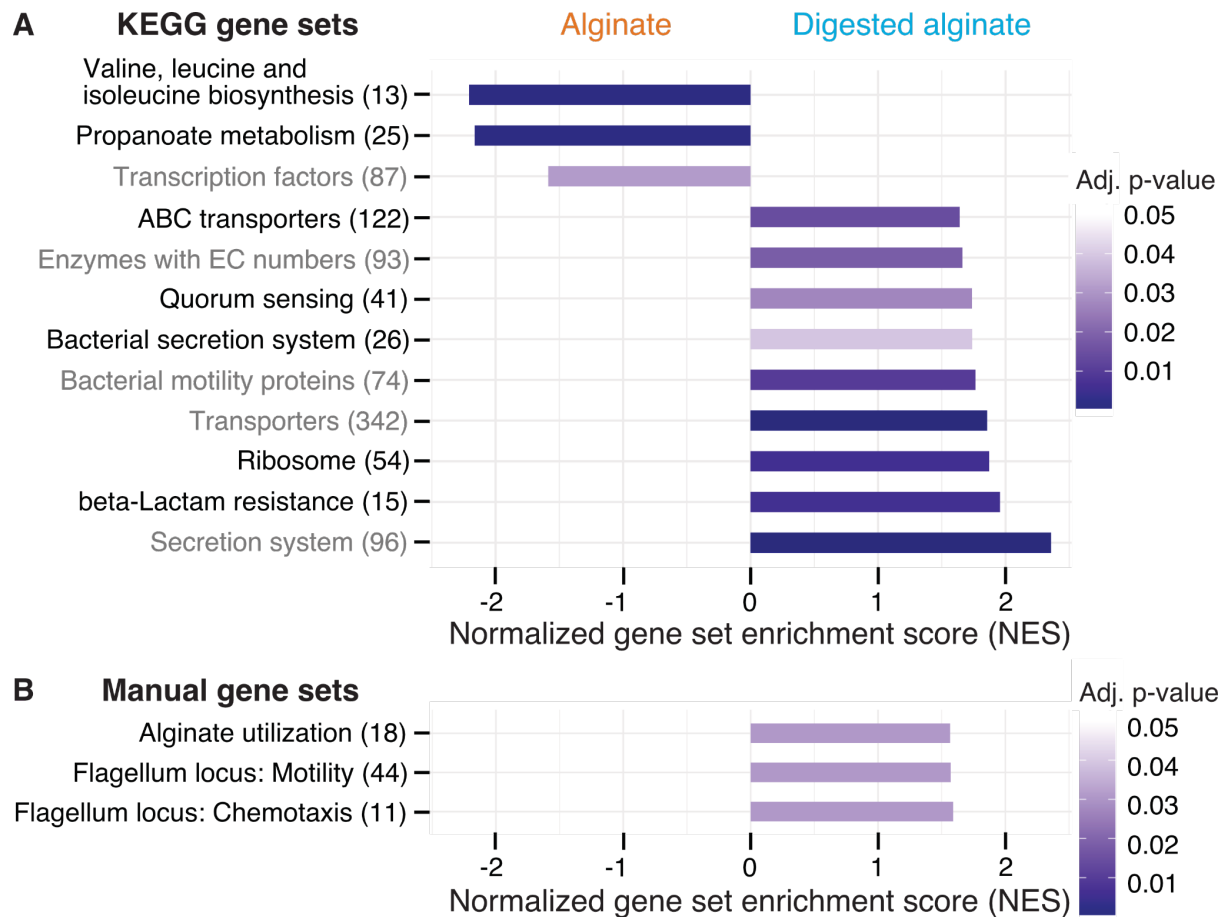

303

304

305

306

307

308

309

310

311

312

313

314

315

316

317

318

**Figure 4. Twelve functional gene sets are enriched in genes with increased or decreased expression in cells grown on digested alginate.** Gene set enrichment analysis (GSEA) with (A) all KEGG pathways and KEGG BRITE categories as gene sets or with (B) a custom alginate utilization, flagellar assembly, and flagellum-driven chemotaxis gene set was performed comparing the gene counts of the transcriptome of *V. cyclitrophicus* ZF270 cultures grown on digested alginate and alginate (six replicates each). Gene sets with a positive enrichment score were enriched with genes with higher expression in cells grown on digested alginate relative to cells grown on alginate (BH-adjusted  $p$ -value  $< 0.05$ ), whereas gene sets with negative enrichment scores were significantly enriched with genes with decreased expression on digested alginate. The number in brackets indicates the number of genes with unique K number per gene set (A) and the number of genes per gene set (B) within the *V. cyclitrophicus* ZF270 genome.

**Growth on digested alginate is associated with increased expression of alginate catabolism, flagellar motility and chemotaxis genes**

For a more fine-grained understanding of the impact of the form of alginate on the alginate catabolism, we investigated specifically the expression of genes involved in alginate degradation, uptake, and

319 catabolism. In the closed genome of *V. cyclitrophicus* ZF270, we identified genes that encode CAZymes  
320 responsible for alginate degradation, namely alginate lyase genes from the PL6, PL7, PL15, and PL17  
321 family. We identified homologs of alginate transporters (porin *kdgM*, symporter *toaA*, *toaB*, and *toaC*)  
322 and metabolic enzymes that shunt into the Entner-Doudoroff pathway (DEHU reductase genes *dehR*,  
323 *kdgK*, and *eda*), based on the known genes in the alginate degradation pathway of *Vibrionaceae*<sup>26,27</sup>.  
324 We found that the expression of most of these genes increased significantly on digested alginate relative  
325 to alginate (Fig. 4B, Fig. 5A, S8A, Table S16). Surprisingly, also the expression of most alginate lyase  
326 genes increased on digested alginate, especially the expression of secreted alginate lyase genes. This  
327 indicates the production of "public" exoenzymes despite the abundance of monomeric and oligomeric  
328 degradation products in the digested alginate medium.

329  
330 The increased motility of cells observed upon exposure to digested alginate (Fig. 3, Fig. 4A) led us to  
331 evaluate the expression of motility- and chemotaxis-associated genes across digested alginate and  
332 alginate treatments. As flagella are the main mode of motility in the genus *Vibrio*<sup>28,29</sup>, we focused on  
333 the expression of flagella-related genes. In the genome of *V. cyclitrophicus* ZF270 we found a gene  
334 cluster that encodes most genes involved in flagellar assembly and that was flanked by chemotaxis  
335 genes (hereon called flagellar locus, Fig. S8B, and Table S17). Overall, 21/34 flagellar locus genes were  
336 differentially expressed (log<sub>2</sub> fold change > 0.5, BH-adjusted *p*-value < 0.01) and the majority (90%)  
337 of these differentially expressed genes showed increased expression on digested alginate (Fig. 4B). The  
338 flagellar genes *flgA*, *fliC*, and *fliH* and the chemotaxis gene *cheW* showed the strongest overexpression  
339 (5.4, 3.8, 2.0, and 2.6-fold, respectively). The expression of flagellar biosynthesis genes in *Vibrionaceae*  
340 occurs by a cascade of gene expression of four classes of genes (Class I - IV)<sup>30</sup>. We found the expression  
341 of the master regulator of the flagellar biosynthesis regulon, the Class I gene *fliA*, to be 1.6-fold  
342 increased on digested alginate (BH-adj. *p*-value 3e-19)<sup>31</sup>. The Class II regulatory genes *fliBC*,  
343 controlling Class III genes, and *fliA*, controlling Class IV genes, showed 1.5-fold and 1.3-fold increased  
344 expression on digested alginate (BH-adj. *p*-value 1e-12 for *fliB*, 2e-39 for *fliC*, 6e-15 for *fliA*) (Fig.  
345 5B)<sup>29,32</sup>. These findings suggest that the increased phenotypic motility observed on digested alginate  
346 (Fig. 3) is related to the upregulation of flagellar biosynthesis genes. Additionally, the expression of the



358 **Figure 5. Digested alginate increases expression of genes involved in alginate degradation, uptake and**  
359 **catabolism, as well as flagellar assembly and chemotaxis.** Genome-wide differential expression analysis where  
360 the log<sub>2</sub> fold changes of gene expression on digested alginate compared to alginate is shown for (A) alginate  
361 lyases (*PL6*, *PL7*, *PL15*, *PL17*), transporters (porin *kdgM*, symporter *toaB*, symporter *toaC*), and metabolic  
362 enzymes shunting into the Entner-Doudoroff pathway (DEHU reductase *DehR*, *kdgK*, *eda*), (B) genes of the  
363 flagellar locus associated with flagellar assembly and (C) adjacent chemotaxis genes. Genes displayed in (B) and  
364 (C) are part of the KEGG pathways "Bacterial motility proteins" and "Bacterial chemotaxis". Differential  
365 expression analysis was performed to compute the Benjamini-Hochberg-adjusted Wald test *p*-value ("BH-adj. *p*-  
366 value", text color and box outline color) and log<sub>2</sub> fold change (box fill color) for each gene (box). For better  
367 visibility, genes that exhibited a log<sub>2</sub> fold gene expression change greater than 1 (i.e., doubling of expression) or  
368 less than -1 (i.e., halving of expression) are designated maximum intensity of red or blue, respectively. Genes with  
369 BH-adj. *p*-value smaller than 0.01 were considered significantly differentially expressed. In (A), the location of  
370 the gene products was based on Figure 1 of Wargacki et al.<sup>26</sup> with the exception of the alginate lyases (*PL6*, *PL7*,  
371 *PL15*, *PL17*) which were placed based on their signal peptides (S: extracellular, LS: membrane-embedded, none:  
372 cytosolic). In (B) and (C) the gene location and depiction were based on the KEGG pathway "Flagellar assembly"  
373 (map02040), "Bacterial chemotaxis" (map02030), and Figure 3 of Rajagopala et al.<sup>35</sup>. Genes without known  
374 cellular location were omitted here but displayed in the genomic architecture in Fig. S5. Arrow: activation; dashed  
375 arrow: modification; "flat" arrow: inhibition; OM: outer membrane; PM: periplasm; IM: inner membrane; PL:  
376 polysaccharide lyase family; *kdgM*: oligogalacturonate-specific outer membrane porin; *toaABC*: oligoalginate  
377 symporter; DEH: 4-deoxy-L-erythro-5-hexoseulose uronic acid; *dehR*: DEH reductase; KDG: 2-keto-3-deoxy-  
378 gluconate; *kdgK*: KDG kinase; KDPG: 2-keto-3-deoxy-6-phosphogluconate; *eda*: KDG-6-phosphate aldolase;  
379 GAP: glyceraldehyde 3-phosphate; ED: Entner-Doudoroff; ns: not significant, i.e. BH-adj. *p*-value > 0.01.

380

## 381 Discussion

382 On Earth organic carbon is mostly present in the form of polysaccharides<sup>1,2</sup>, which are often in a  
383 particulate state and form a heterogeneous resource landscape. Over the last years, the study of  
384 extracellular bacterial degradation of polysaccharides has revealed that bacterial growth on  
385 polysaccharides increases with increased cell density, enabling cells to benefit from the exoenzymes  
386 and extracellular degradation products of surrounding cells otherwise lost to diffusion ("cooperative



387 growth")<sup>36-38</sup>. However, cells have been observed not only to aggregate on polysaccharide sources, but  
388 also to leave them before the source is depleted<sup>13,38</sup>. This has thus far been interpreted with optimal  
389 foraging theory, which weighs the diminishing returns of harvesting resources from a nutrient hotspot  
390 against the predation and opportunity costs which ensue<sup>39,40</sup>, but the cellular mechanisms that drive the  
391 cell dispersal remain unclear.

392

393 Our work links these observations and connects them to the cellular mechanisms that underlie the  
394 degradation-dispersal cycles of bacterial degraders, which we see as basal drivers of the biogeochemical  
395 processing of polysaccharides in heterogeneous nutrient-scapes. When bacteria encounter a new source  
396 of biomass, their local environment likely contains few mono- or oligosaccharides but is rich in  
397 polysaccharides which usually require extracellular breakdown (Fig. 6, "Finding a new nutrient  
398 source"). General concepts of how bacteria recognize the presence of large biopolymers remain elusive,  
399 but it was proposed that "sentry" enzymes are constitutively expressed at a basal level to cleave mono-  
400 or oligosaccharides from polysaccharides, which cells can take up and which prime their metabolism  
401 for the degradation of the respective polysaccharide<sup>41,42</sup>. It is not known yet how widespread the concept  
402 of sentry enzymes may be, but the observation of a constitutively expressed PL7 and PL15 family  
403 alginate lyase gene in *Z. galactanivorans*<sup>41</sup> is mirrored in our work by the constant expression of an  
404 extracellular PL7 family alginate lyase gene, which may act as sentry enzyme that helps to initiate  
405 alginate degradation when cells encounter alginate.

406

407 It has been previously found that cells grow slowly until a critical cell density for efficient cooperative  
408 polymer breakdown is reached<sup>36</sup>, observed here as the formation of large cell groups. In this stage, cells  
409 start to benefit from the diffusing degradation products and exoenzymes of cells in their local  
410 environment and reach their maximal growth rate (Fig. 6, "Early-stage polysaccharide breakdown").  
411 We found that cells grown on degradation products reached their maximal growth earlier and showed  
412 increased expression of ribosomal biosynthesis, enzyme secretion, especially of secreted alginate  
413 lyases, transporters, quorum sensing and expression changes in the central carbon metabolism. The  
414 secretion of secreted alginate lyases might seem surprising and wasteful in a monomer-rich

415 environment. We speculate that enhanced enzyme secretion supports the continued growth of detached  
416 bacteria's offspring that remain on the particle, as observed in the case of *V. splendidus* 1AO1 during  
417 chitin particle degradation<sup>43</sup>. Another reason may be that cells primarily rely on intracellular  
418 monosaccharide levels to trigger the upregulation of genes associated with polysaccharide degradation  
419 and catabolism, as seen in *E. coli* across various carbon sources<sup>44,45</sup>, unable to modulate the expression  
420 of degrading enzymes based on the extracellular presence of monomers.

421

422 We show that cells respond to the exposure to degradation products with dispersal from dense cell  
423 groups by means of increased flagellum-driven swimming (Fig. 6, "Late-stage polysaccharide  
424 breakdown"), decreasing their local cell number. This finding matches with previous observations of  
425 cells leaving biopolymer particles before they are depleted<sup>13,38</sup>. A plausible explanation for this density-  
426 dependent dispersal is that cells in larger groups compete with each other for nutrients and space, while  
427 not profiting from cooperative degradation anymore due to the abundance of degradation products.  
428 Motility has also been shown to increase the encounter rate of cells with sources of nutrients<sup>46,47</sup>,  
429 suggesting motility as a strategy that allows cells to escape from the ensuing competition. Previous  
430 work in *Caulobacter crescentus* demonstrated that a flagellum knock-out mutant formed larger cell  
431 groups, resulting in reduced growth rates due to intercellular competition<sup>4,14</sup>. While it would be  
432 interesting to study non-motile mutants of *V. cyclitrophicus* ZF270, the non-tractability of natural  
433 isolates makes direct tests of molecular mechanisms difficult. Additionally, subjecting cells separately  
434 to the two monomeric units of alginate or oligomers of defined size could improve our understanding  
435 of the specific molecules that trigger motility, but this was experimentally not feasible. We also found  
436 that the presence of degradation products increased the expression of chemotaxis genes and detected  
437 that cells chemotaxis toward polymeric alginate, but not digested alginate, analogous to previous  
438 findings on chitin<sup>46-48</sup>. Even though this may first seem counterintuitive, it makes sense in the light of  
439 the dispersal process: chemotaxis towards degradation products would prevent cells from leaving a  
440 nutrient source, whereas chemotaxis towards polymers may increase encounters with a fresh nutrient  
441 source<sup>49</sup> (Fig. 6, "Finding a new nutrient source"), on which cells can re-initiate degradation. This

442 strategy allows cells to alternate between degradation and dispersal to acquire carbon and energy in a  
443 heterogeneous world with nutrient hotspots<sup>50-53</sup>.  
444

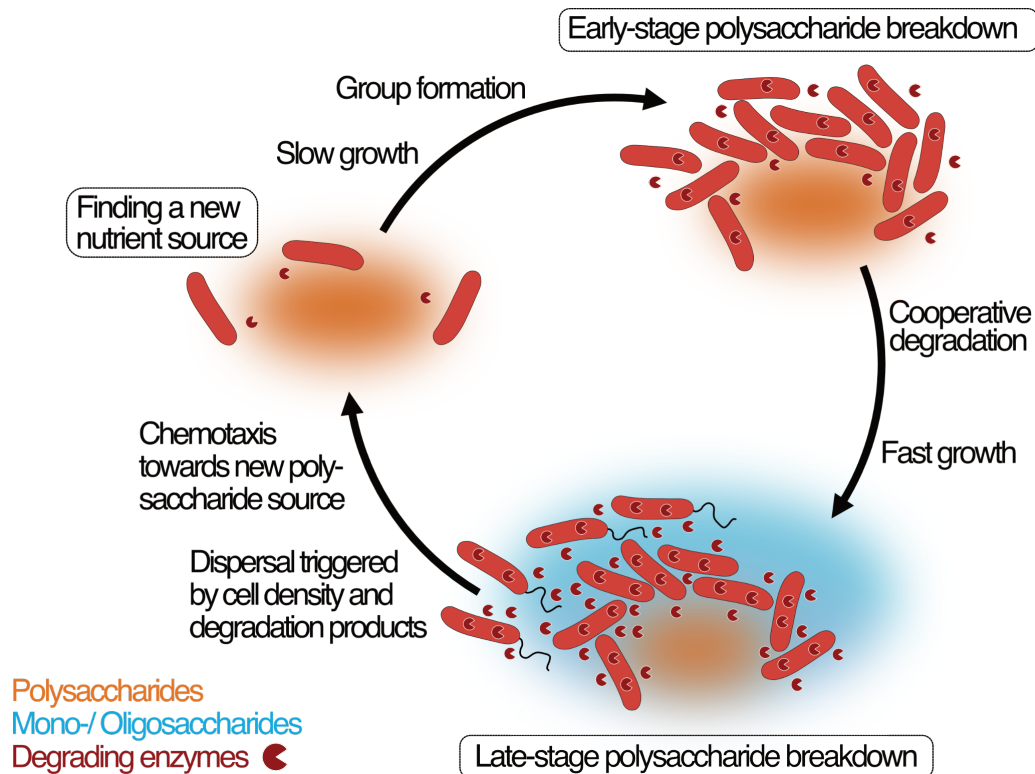

445

446 **Figure 6. Bacterial growth and regulation on patches of polysaccharides.** Based on our findings we propose  
447 a conceptual model where degradation of polysaccharides proceeds after the encounter of a polymer source by  
448 bacterial cells that have a basal exoenzyme production of "sentry" enzymes ("Encounter of a new carbon source").  
449 This phase is succeeded by group formation, which enables cells to benefit from exoenzymes of neighboring cells  
450 and diffusing degradation products ("Early-stage polysaccharide breakdown"). The following phase includes  
451 cooperative extracellular degradation of the polysaccharide source, further increasing the concentration of  
452 available degradation products. These degradation products trigger the overexpression of alginate degrading,  
453 importing, and catabolizing enzymes, ensuring swift polysaccharide degradation ("Late-stage polysaccharide  
454 breakdown"). The increased pool of breakdown products also cues flagellar swimming and chemotaxis in a  
455 subpopulation of cells towards new polysaccharide sources, thus restarting the cycle of degradation of polymeric  
456 carbohydrates by heterotrophic bacteria. Cells and molecules are not drawn to scale. Dark red pie symbols:  
457 intracellular and extracellular polysaccharide-degrading enzymes; orange shading: a polymeric carbon source;  
458 blue shading: monomeric or oligomeric degradation products.

## 459 **Conclusion**

460 The heterogeneous landscape of polysaccharide hotspots in natural systems requires bacteria to  
461 effectively break down polymeric carbohydrates as well as readily ensure dispersal to new nutrient  
462 hotspots. Our findings show that the degree of depolymerization of the polysaccharide influences this  
463 decision, altering the growth dynamics, metabolic activity, and motility of cells. Our study also  
464 contextualizes the surprising finding that foraging bacteria majorly leave polysaccharide particles  
465 before the last third of the particle is consumed<sup>38</sup>. Dispersal from a partially degraded carbon source  
466 may serve several purposes: (i) escaping competition that ensues within large cell groups, (ii) ensuring  
467 the spread of a part of the clonal population to new environments as bet hedging strategy<sup>40,54</sup>, here  
468 guided by chemotaxis towards new nutrient hotspots, (iii) preventing whole populations degrading a  
469 sinking marine particle or a deposited sediment particle to be buried in depth where nutrient hotspots  
470 become sparse<sup>38,55</sup>, and/or (iv) increase the genetic variation in bacterial populations<sup>40</sup>. However,  
471 dispersal may also occur when a nutrient source offers a surplus of carbon while other essential nutrients  
472 become limiting, as the increased expression of iron, zinc, and phosphate transporters in cells grown on  
473 digested alginate suggested. These findings emphasize that metabolic molecules can also act as triggers  
474 of dispersal, expanding upon the current perspective of dispersal in biofilms as a reaction to dispersal  
475 cues like NO, signalling molecules, nutrient starvation, and oxygen starvation<sup>56</sup>. The study of bacterial  
476 motility on increasingly complex biomass particles will reveal the role of the nutrient composition of  
477 the present nutrient hotspot on the bacterial decision-making. Overall, these new insights into the  
478 cellular mechanisms and regulation that drive degradation-dispersal cycles contribute to our  
479 understanding of the microbially driven remineralization of biomass, and factors that modulate this  
480 process. The open questions of how bacteria sense polysaccharides in their environment, which cell  
481 signaling pathways integrate the presence of degradation products in the cellular decision-making of  
482 degradation and dispersal, and to what extent cell populations coordinate this decision, present an  
483 exciting avenue of further research.

484

485

486

## 487 **Materials and Methods**

### 488 *Bacterial strains, media and growth assays*

489 *Vibrio cyclitrophicus* ZF270 (available through Culture Collection Of Switzerland; Accession number:  
490 2043) cells were cultured in Marine Broth (DIFCO) and grown for 18 hours at 25 °C. Cells from these  
491 cultures were used for growth experiments in Tibbles Rawling (TR) salts minimal medium<sup>57,58</sup>  
492 containing either 0.1% (weight/volume) algae-derived alginate (referred to as "alginate") (Sigma  
493 Aldrich, CAS-number 9005-38-3) or 0.1% (weight/volume) digested alginate. The digested alginate  
494 was produced by enzymatically digesting 2% alginate with 1 unit ml<sup>-1</sup> of alginate lyase (Sigma Aldrich,  
495 CAS-number 9024-15-1) at 37 °C for 48 hours. Carbon sources were prepared in nanopure water and  
496 filter sterilized using 0.40 µm Surfactant-Free Cellulose Acetate filters (Corning, USA). Well-mixed  
497 batch experiments in alginate or digested alginate medium were performed in 96-well plates (Greiner  
498 Bio) and growth dynamics were measured using a microwell plate reader (Biotek, USA). Assays were  
499 initiated as described previously<sup>59</sup>. Briefly, 1 ml from a culture grown for 18 h on Marine broth was  
500 centrifuged at 5000 g in 1.5 ml microfuge tubes for 5 minutes. The supernatant was discarded and the  
501 cell pellet was subjected to two rounds of washing with the basal TR salts medium. The cell-pellet was  
502 then resuspended in 1 ml of TR salts medium and 5 µl of this suspension inoculated into 195 µl TR  
503 medium with either carbon source (~10<sup>5</sup> colony forming units (CFUs ml<sup>-1</sup>) in a 96-well plate (Greiner  
504 Bio). The optical density (600 nm) was then measured every 15 minutes for 40 hours. All measurements  
505 had six biological replicates.

506

### 507 *Alginate oligosaccharide measurements*

508 Oligosaccharide measurements were performed using liquid chromatography time of flight mass  
509 spectrometry (LC-QTOF-MS). Samples were prepared by diluting 1:20 in milliQ water and 5 µL of  
510 sample was injected per measurement. Chromatographic separation was performed using an Agilent  
511 1290 stack, using an Agilent HILIC-Z column (2.7 µm particles, 2.1 x 50 mm). Mobile phase A  
512 contained 10% acetonitrile (Fisher Scientific) and 0.1% medronic acid (Agilent), and Mobile phase B  
513 contained 90% acetonitrile and 0.1% medronic acid. The separation was performed as follows: Mobile  
514 phase B 100% for 1 minute, gradient to 30% phase B over 3 minutes, 30% phase B for 30 seconds, and

515 equilibration of 100% phase B for 5 minutes. The flow rate was  $400 \mu\text{L min}^{-1}$  at  $30 \text{ }^\circ\text{C}$ . Samples were  
516 measured using an Agilent 6520 mass spectrometer in negative mode, in 4 GHz high-resolution mode.  
517 Data analysis was performed in Agilent Quantitative Analysis software.

518

#### 519 *Microfluidics and time-lapse microscopy*

520 Microfluidic experiments and microscopy were performed as described previously<sup>14,16,60</sup>. Cells were  
521 imaged within chambers of a PDMS (Sylgard-Dow) microfluidic chip that ranged in size from 60-120  
522  $\times 60 \times 0.56 \mu\text{m}$  ( $l \times b \times h$ ). Within these chambers, cells can attach to the glass surface and experience  
523 the medium that diffuses through lateral flow channels. Imaging was performed using IX83 inverted  
524 microscope systems (Olympus, Japan) with automated stage controller (Marzhauser Wetzlar,  
525 Germany), shutter, and laser-based autofocus system (Olympus ZDC 2). Chambers were imaged in  
526 parallel on the same PDMS chip, and phase-contrast images of each position were taken every 8 or 10  
527 minutes. The microscopy unit and PDMS chip were maintained at  $25 \text{ }^\circ\text{C}$  using a cellVivo microscope  
528 incubation system (Pecon GmbH).

529

#### 530 *Motility assays*

531 Cells were grown for 10 hours in Marine Broth (DIFCO) after which  $10 \mu\text{l}$  of culture was used to  
532 inoculate culture tubes (Greiner) containing 5 ml of TR medium with either 0.1% alginate or 0.1%  
533 digested alginate. After 6 hours of growth at  $25 \text{ }^\circ\text{C}$ ,  $2 \mu\text{l}$  of cell suspension was inoculated into  
534 microfluidic growth chambers. Cells within six replicate chambers were then imaged with the phase-  
535 contrast channel at a high frame rate ( $125 \text{ Hz}$ , i.e.,  $\text{frames s}^{-1}$ ) using the same microscopy setup described  
536 above.

537

#### 538 *Chemotaxis assays*

539 To assess whether polymeric alginate and digested alginate attract *Vibrio cyclitrophicus* ZF270, we  
540 used the *In Situ* Chemotaxis Assay<sup>17,18</sup> (ISCA), a microfluidic device consisting of a  $5 \times 5$  array of  
541 microwells that can be individually loaded with solutions of different chemicals ( $110 \mu\text{l}$  each). Once  
542 the ISCA is deployed in an aqueous environment, the chemicals diffuse out of the wells through a small

543 port, creating chemical gradients which will guide chemotactic bacteria inside the wells of the  
544 device<sup>17,18</sup>. *Vibrio cyclitrophicus* ZF210 was plated on Marine Agar (BD Difco) from a glycerol stock  
545 and grown for 16 h at 27 °C. A single colony was then incubated in 10% Marine Broth (BD Difco) in  
546 0.22- $\mu$ m filtered artificial seawater (Instant Ocean, Spectrum Brands) and grown overnight at 27 °C and  
547 180 rpm. The culture was diluted down to  $1 \times 10^6$  cells ml<sup>-1</sup> in 0.22  $\mu$ m filtered artificial seawater (Instant  
548 Ocean, Spectrum Brands) to perform the chemotaxis experiment. Both chemoattractants (alginate and  
549 digested alginate) were diluted in sterile seawater (35 g l<sup>-1</sup>; Instant Ocean, Spectrum Brands) at a final  
550 concentration of 0.1% and then filtered with a 0.2  $\mu$ m filter (Millipore) to remove particles and potential  
551 contaminants. Within the ISCA, one full row of five wells was used per chemoattractant as technical  
552 replicates. The chemoattractants were injected in triplicate ISCA with a sterile 1 ml syringe (Codau)  
553 and needle (27 G, Henke Sass Wolf). A last row containing 0.2  $\mu$ m-filtered seawater acted as negative  
554 control accounting for cells swimming in the device by random motility only. Experiments were  
555 conducted by incubating the ISCAs for 1 h in the diluted *Vibrio cyclitrophicus* ZF270 culture. Upon  
556 time completion, a sterile syringe and needle were used to retrieve the content of the wells and  
557 transferred to 1 ml microfuge tubes resulting in a pooling of a row of 5 wells containing the same  
558 sample. Sample staining was performed with SYBR Green I (Thermo Fisher) and the chemotactic  
559 response was quantified by counting cells using flow cytometry. The strength of the chemotactic  
560 response was determined by the mean chemotactic index ( $I_C$ ), defined as the ratio of the number of cells  
561 found in each chemoattractant to the number of cells in control wells containing filtered seawater (so  
562 that attraction corresponds to  $I_C > 1$ ).

563

#### 564 *Culturing and harvesting cells for transcriptomics*

565 Cells were grown for 18 hours in Marine Broth (DIFCO) after which 1 ml of culture was centrifuged at  
566 5000 g in 1.5 ml microfuge tubes for 5 minutes. The supernatant was discarded and the cell pellet was  
567 subjected to two rounds of washing with the basal TR salts medium. The cell pellet was then  
568 resuspended in 1 ml of TR salts medium and 250  $\mu$ l of this suspension were used to inoculate 100 ml  
569 flasks (Schott-Duran) containing 10 ml of TR medium with either 0.1% alginate or 0.1% digested  
570 alginate. This was done in parallel for six flasks. Once cultures in the flasks reached mid-exponential

571 phase (10 hours and 15 hours after inoculation for digested alginate and alginate, respectively) and had  
572 approximately the same OD (0.39 for digested alginate and 0.41 for alginate), 2 ml of cultures were  
573 harvested for RNA extraction. Samples were stabilized with the RNprotect reagent (Qiagen) and RNA  
574 was extracted using the RNeasy mini kit (Qiagen).

575

#### 576 *Sequencing and gene annotation of Vibrio cyclitrophicus ZF270*

577 Long read sequencing using the Oxford Nanopore Platform (Long read DNA sequencing kit) and short  
578 read sequencing using the Illumina platform (Illumina DNA Prep kit and IDT 10bp UDI indices, and  
579 sequenced on an Illumina NextSeq 2000 producing 2x151bp reads) was performed by the Microbial  
580 Genome Sequencing Center, Pittsburgh, USA (MiGS), to create a new closed reference genome of *V.*  
581 *cyclitrophicus* ZF270 (BioProject PRJNA991487). Annotation of this genome was done with RASTtk  
582 (v2.0, Rapid Annotation using Subsystem Technology tool kit<sup>61</sup>). Additionally, KEGG Ontology  
583 identifiers ("K numbers") were annotated with BlastKOALA (v2.2)<sup>62</sup>. Dedicated annotation of alginate  
584 lyase genes was performed by homology search for proteins belonging to the PL5, PL6, PL7, PL14,  
585 PL15, PL17, PL18, PL31, PL36, or PL39 family<sup>63</sup> by dbCAN2 (v9.0)<sup>64</sup>. Enzymes for alginate transport  
586 and metabolism were identified by BLASTn-search<sup>65,66</sup> of gene sequences of *Vibrio splendidus* 12B01,  
587 which were previously identified as minimum genetic prerequisites for alginate utilization and enabled  
588 alginate degradation when cloned into *E. coli*<sup>26</sup>.

589

#### 590 *Location prediction of alginate lyases*

591 Signal peptides were annotated using SignalP (v.5.0)<sup>67</sup>, and LipoP (v.1.0)<sup>68</sup>. SignalP discriminated  
592 between 1) Sec/SPI: "standard" secretory signal peptides transported by the Sec translocon and cleaved  
593 by Signal Peptidase I (SPI), 2) Sec/SPII: lipoprotein signal peptides transported by the Sec translocon  
594 and cleaved by Signal Peptidase II (SPII), and 3) Tat/SPI: Tat signal peptides transported by the Tat  
595 translocon and cleaved by SPI. LipoP discriminates between 1) SPI: signal peptide, 2) SpII: lipoprotein  
596 signal peptide, and 3) TMH: n-terminal transmembrane helix. All predictions were in agreement, apart  
597 from one PL7 (gene 1136176.5.peg.4375) which was predicted by LipoP as cytoplasmic and by SignalP  
598 as equally likely cytoplasmic as containing a lipoprotein signal peptide.



599

600 *Transcriptomic analysis: Sequencing, pre-processing, differential expression analysis, and functional*  
601 *analysis*

602 Sequencing (12 M reads, 2 x 50 bp) of the isolated RNA was performed by MiGS after rRNA depletion  
603 using RiboZero Plus (Illumina). cDNA libraries were prepared using an Illumina DNA Prep kit and IDT  
604 10 bp UDI indices, and sequenced on an Illumina NextSeq 2000. Preprocessing of the raw reads was  
605 carried out as follows: Quality control was performed with FastQC (v0.11.9)<sup>69</sup> and reads were trimmed  
606 with Trimmomatic (v0.38)<sup>70</sup>; the high-quality reads were mapped to the reference genome (described  
607 above) with Bowtie2 (v2.3.5.1)<sup>71</sup>; binarization, sorting, and indexing were done with Samtools  
608 (v1.10)<sup>72</sup>; gene counts were computed with the featureCount function of Subread (v2.0.1)<sup>73</sup>.

609 Differential expression analysis was performed with DESeq2 (v1.30.1)<sup>74</sup>. In brief, DESeq2 normalizes  
610 the raw read counts with normalization factors ("size factors") to account for differences in sequencing  
611 depth between samples. Subsequently, gene-wise dispersion estimates are computed for each gene  
612 separately using maximum likelihood, and then shrunk toward the values predicted by the dispersion-  
613 mean dependence curve to obtain final dispersion values. Finally, DESeq2 fits a negative binomial  
614 model to the read counts and performs significance testing using the Wald test. Here reported *p*-values  
615 result from the Wald test of read counts from the digested alginate condition compared to the alginate  
616 condition and were adjusted for multiple testing by Benjamini-Hochberg correction<sup>75</sup> as implemented  
617 in the p.adjust function of base R (v4.1.2). The reported log<sub>2</sub> fold changes indicate the log<sub>2</sub>(DESeq2-  
618 normalised reads in digested alginate condition / DESeq2-normalised reads in alginate condition) for  
619 each gene.

620 Visualization of gene maps was performed in R with the ggplot2 package (v3.4.0) and the extension  
621 gggenes (v0.4.1) by David Wilkins.

622 For systematic functional analysis we performed gene set enrichment analysis (GSEA)<sup>19</sup> using the fgsea  
623 function of the fgsea package (v1.20.0) with minimal number of unique genes per gene set "minSize"  
624 = 5 and number of permutations "nPermSimple" = 1000000. In brief, GSEA takes the full gene list  
625 ranked by log<sub>2</sub> fold change and annotated with K numbers as input and determines whether the member  
626 genes of any KEGG pathway are randomly distributed throughout the ranked gene list or whether they

627 are primarily found at the top or bottom<sup>19</sup>. This is quantified by the enrichment score (ES), which  
628 corresponds to a weighted Kolmogorov-Smirnov-like statistic. The ES of each gene set is normalized  
629 to the mean enrichment of random samples of the same size to account for the size of the set, yielding  
630 the normalized enrichment score (NES). To estimate the significance level of the enrichment score, the  
631 *p*-value of the observed enrichment score is calculated relative to a null distribution that was computed  
632 from permuted data. The estimated significance level was adjusted to account for multiple hypothesis  
633 testing. As gene sets we chose all KEGG pathways and KEGG BRITE categories (as noted in Table S1  
634 in column "KEGG\_pathway") within all genes of *V. cyclitrophicus* ZF270 annotated with a KEGG  
635 Ontology identifier ("K number"). Visualization of differential expression levels in KEGG pathways  
636 was performed with the R package pathview (v1.35.0)<sup>76</sup>. We also formed gene sets of the genes  
637 associated with alginate utilization (see "*Sequencing and gene annotation of Vibrio cyclitrophicus*  
638 ZF270", Table S16), of the genes of the flagellar locus that map to the KEGG pathways "Bacterial  
639 motility proteins", and of the genes of the flagellar locus that map to the KEGG pathways "Bacterial  
640 chemotaxis" (as noted in Table S17) within all genes of *V. cyclitrophicus* ZF270.

641

#### 642 *Image analysis*

643 Cells within microscopy images were segmented and tracked using ilastik (v1.3) ("pixel classification  
644 workflow" and "tracking with probabilities workflow"). Phase contrast images were used for alignment,  
645 segmentation, tracking and linking. Images were cropped at the boundaries of each microfluidic  
646 chamber. The lineage identity of each single cell was assigned by ilastik's tracking plugin and visualized  
647 by coloring the segmented cells, respectively. The growth rate of each cell was computed as the change  
648 of cell area over time, i.e., via a linear regression of the single-cell area over the time between  
649 consecutive cell divisions, based on ilastik's segmentation and tracking output. Cells that were tracked  
650 over less than three frames were excluded. Measurement of swimming speeds and displacement of cells  
651 was performed using ilastik (v1.4), ImageJ (v2.3) and Trackmate (v7.5.2). Briefly, cell-segmentation  
652 ("pixel classification workflow" in ilastik) and tracking ("animal tracking workflow" in ilastik) were  
653 performed using the high frame rate phase contrast images in ilastik (v1.4). Cell trajectories and  
654 properties were then computed using the output of the ilastik workflow in Trackmate.

655

656 *Dispersal analysis*

657 For the analysis on the dispersal of cells (Fig. 2), we computed the cell number as the total number of  
658 cells within a microfluidic chamber. The change in the number of cells was computed by subtracting  
659 the number of cells before the medium switch (i.e., average number of cells between  $t = 1.9$  to  $2.1$  h)  
660 from the number of cells after the medium switch (i.e., average number of cells between  $t = 3.9$  to  $5.5$   
661 h).

662

663 *Datasets and statistical analysis*

664 All batch experiments were replicated 3 to 6 times. Growth curves were analyzed in Python (v3.7) using  
665 the *Amiga* package (v1.1.0)<sup>77</sup> and GraphPad Prism (v8, GraphPad Software). The microscopy dataset  
666 consisted of eight chambers each, corresponding to the eight replicates shown in Figure 1 and Figure 2.  
667 These were grouped into two biological replicates wherein each biological replicate was fed by media  
668 through a unique channel in a microfluidic chip. Cells with negative growth rates were excluded from  
669 the analysis after visual curation, as they represented artefacts, mistakes in segmentation or linking  
670 during the tracking process, or non-growing deformed cells. Each chamber was treated as an  
671 independent replicate. Comparisons were considered statistically significant when  $p < 0.05$  or when the  
672 False Discovery Rate (FDR)-corrected  $q$  was smaller than 0.05. FDR corrections were applied when  
673 multiple t tests were performed for the same dataset. Measures of effect size are represented by the  $R^2$   
674 or  $\eta^2$  value. All statistical analyses were performed in GraphPad Prism v9.0 (GraphPad Software,  
675 USA), R v4.1.2, RStudio v1.1.463 (Posit, USA).

676

677 **Acknowledgements:** We thank past and present members of the Microbial Systems Ecology group for  
678 feedback. This research was supported by an ETH fellowship and a Marie Skłodowska-Curie Actions  
679 for People COFUND program fellowship (FEL-37-16-1) to GD; an ETH Career Seed Grant to GD  
680 (FEL-14 18-1), the Simons Foundation Collaboration on Principles of Microbial Ecosystems (PriME,  
681 #542379 and #542395) to MA and RS; and by ETH Zurich and Eawag.

682

683 **Data Availability:** Sequencing data is available on NCBI, BioProject PRJNA991487, upon publication.

684 All further data is deposited on ERIC Open (<https://opendata.eawag.ch/>,  
685 <https://doi.org/10.25678/0008MH>), available upon publication. All code will be made publicly  
686 accessible on <https://github.com/Microbial-Systems-Ecology/publications> upon publication.

687

688 **Competing interests:** The authors declare no competing interests.

689

690 **Author Contributions:** GD, AS, JS, and JK conceived the research along with MA. GD designed and  
691 performed the experiments. AS developed and implemented the algorithms to compute single-cell  
692 growth rates and visualize lineage identities from segmented and tracked cells. AS analyzed and  
693 visualized the RNA-seq data. JK conceived and implemented the cell dispersal analysis. EC conducted  
694 the ISCA experiment. SP carried out the mass spectrometry measurements. AS and GD analyzed the  
695 data with inputs from JK, JS, CM, MA, and RS. AS wrote the manuscript with inputs from GD, OS,  
696 MA, JK, JS, EC, SP, CM, and RS.

697

698

699 **Citations:**

- 700 1. BeMiller JN. 4 - Polysaccharides: Occurrence, Structures, and Chemistry. In: BeMiller JN, ed.  
701 *Carbohydrate Chemistry for Food Scientists (Third Edition)*. AACC International Press; 2019:75-  
702 101. doi:10.1016/B978-0-12-812069-9.00004-2
- 703 2. Reintjes G, Arnosti C, Fuchs B, Amann R. Selfish, sharing and scavenging bacteria in the Atlantic  
704 Ocean: a biogeographical study of bacterial substrate utilisation. *ISME J.* 2019;13(5):1119-1132.  
705 doi:10.1038/s41396-018-0326-3
- 706 3. Ratzke C, Gore J. Self-organized patchiness facilitates survival in a cooperatively growing *Bacillus*  
707 *subtilis* population. *Nature Microbiology.* 2016;1(5):16022. doi:10.1038/nmicrobiol.2016.22
- 708 4. Povolito VR, D'Souza GG, Kaczmarczyk A, Stubbusch AK, Jenal U, Ackermann M. Extracellular  
709 appendages govern spatial dynamics and growth of *Caulobacter crescentus* on a prevalent  
710 biopolymer. *bioRxiv*. Published online January 1, 2022:2022.06.13.495907.  
711 doi:10.1101/2022.06.13.495907
- 712 5. Westrich JR, Griffin DW, Westphal DL, Lipp EK. *Vibrio* Population Dynamics in Mid-Atlantic  
713 Surface Waters during Saharan Dust Events. *Frontiers in Marine Science.* 2018;5.  
714 <https://www.frontiersin.org/articles/10.3389/fmars.2018.00012>

- 715 6. Takemura A, Chien D, Polz M. Associations and dynamics of Vibrionaceae in the environment,  
716 from the genus to the population level. *Frontiers in Microbiology*. 2014;5.  
717 <https://www.frontiersin.org/articles/10.3389/fmicb.2014.00038>
- 718 7. Schwartzman JA, Ebrahimi A, Chadwick G, Sato Y, Orphan V, Cordero OX. Bacterial growth in  
719 multicellular aggregates leads to the emergence of complex lifecycles. *bioRxiv*. Published online  
720 January 1, 2021:2021.11.01.466752. doi:10.1101/2021.11.01.466752
- 721 8. D'Souza G, Ebrahimi A, Stubbusch A, et al. Cell aggregation is associated with enzyme secretion  
722 strategies in marine polysaccharide-degrading bacteria. *ISME J*. Published online February 22,  
723 2023. doi:10.1038/s41396-023-01385-1
- 724 9. Wang X, Liu J, Liang J, Sun H, Zhang XH. Spatiotemporal dynamics of the total and active *Vibrio*  
725 spp. populations throughout the Changjiang estuary in China. *Environmental Microbiology*.  
726 2020;22(10):4438-4455. doi:10.1111/1462-2920.15152
- 727 10. Mabeau S, Kloareg B. Isolation and Analysis of the Cell Walls of Brown Algae: *Fucus*  
728 *spiralis*, *F. ceranoides*, *F. vesiculosus*, *F. serratus*, *Bifurcaria bifurcata* and *Laminaria digitata*.  
729 *Journal of Experimental Botany*. 1987;38(9):1573-1580. doi:10.1093/jxb/38.9.1573
- 730 11. Wong TY, Preston LA, Schiller NL. Alginate Lyase: Review of Major Sources and Enzyme  
731 Characteristics, Structure-Function Analysis, Biological Roles, and Applications. *Annual Review of*  
732 *Microbiology*. 2000;54(1):289-340. doi:10.1146/annurev.micro.54.1.289
- 733 12. Hunt DE, David LA, Gevers D, Preheim SP, Alm EJ, Polz MF. Resource Partitioning and  
734 Sympatric Differentiation Among Closely Related Bacterioplankton. *Science*. Published online  
735 May 23, 2008. doi:10.1126/science.1157890
- 736 13. Yawata Y, Cordero OX, Menolascina F, Hehemann JH, Polz MF, Stocker R. Competition–  
737 dispersal tradeoff ecologically differentiates recently speciated marine bacterioplankton  
738 populations. *Proc Natl Acad Sci USA*. 2014;111(15):5622-5627. doi:10.1073/pnas.1318943111
- 739 14. D'Souza GG, Povolo VR, Keestra JM, Stocker R, Ackermann M. Nutrient complexity  
740 triggers transitions between solitary and colonial growth in bacterial populations. *ISME J*.  
741 2021;15(9):2614-2626. doi:10.1038/s41396-021-00953-7
- 742 15. Huang L, Zhou J, Li X, Peng Q, Lu H, Du Y. Characterization of a new alginate lyase from  
743 newly isolated *Flavobacterium* sp. S20. *Journal of Industrial Microbiology and Biotechnology*.  
744 2013;40(1):113-122. doi:10.1007/s10295-012-1210-1
- 745 16. Dal Co A, van Vliet S, Kiviet DJ, Schlegel S, Ackermann M. Short-range interactions govern  
746 the dynamics and functions of microbial communities. *Nat Ecol Evol*. 2020;4(3):366-375.  
747 doi:10.1038/s41559-019-1080-2
- 748 17. Lambert BS, Raina JB, Fernandez VI, et al. A microfluidics-based in situ chemotaxis assay to  
749 study the behaviour of aquatic microbial communities. *Nat Microbiol*. 2017;2(10):1344-1349.  
750 doi:10.1038/s41564-017-0010-9
- 751 18. Clerc EE, Raina JB, Lambert BS, Seymour J, Stocker R. In Situ Chemotaxis Assay to  
752 Examine Microbial Behavior in Aquatic Ecosystems. *JoVE*. 2020;(159):e61062.  
753 doi:10.3791/61062
- 754 19. Subramanian A, Tamayo P, Mootha VK, et al. Gene set enrichment analysis: a knowledge-  
755 based approach for interpreting genome-wide expression profiles. *Proc Natl Acad Sci U S A*.  
756 2005;102(43):15545-15550. doi:10.1073/pnas.0506580102

- 757 20. Wei Y, Lee JM, Richmond C, Blattner FR, Rafalski JA, LaRossa RA. High-Density  
758 Microarray-Mediated Gene Expression Profiling of *Escherichia coli*. *J Bacteriol.* 2001;183(2):545-  
759 556. doi:10.1128/JB.183.2.545-556.2001
- 760 21. Gifford SM, Sharma S, Booth M, Moran MA. Expression patterns reveal niche diversification  
761 in a marine microbial assemblage. *ISME J.* 2013;7(2):281-298. doi:10.1038/ismej.2012.96
- 762 22. Johnson TL, Fong JC, Rule C, Rogers A, Yildiz FH, Sandkvist M. The Type II Secretion  
763 System Delivers Matrix Proteins for Biofilm Formation by *Vibrio cholerae*. *J Bacteriol.*  
764 2014;196(24):4245-4252. doi:10.1128/JB.01944-14
- 765 23. Sikora AE. Proteins Secreted via the Type II Secretion System: Smart Strategies of *Vibrio*  
766 *cholerae* to Maintain Fitness in Different Ecological Niches. Heitman J, ed. *PLoS Pathog.*  
767 2013;9(2):e1003126. doi:10.1371/journal.ppat.1003126
- 768 24. Jemielita M, Wingreen NS, Bassler BL. Quorum sensing controls *Vibrio cholerae*  
769 multicellular aggregate formation. Storz G, ed. *eLife.* 2018;7:e42057. doi:10.7554/eLife.42057
- 770 25. Waters CM, Lu W, Rabinowitz JD, Bassler BL. Quorum sensing controls biofilm formation  
771 in *Vibrio cholerae* through modulation of cyclic di-GMP levels and repression of *vpsT*. *J Bacteriol.*  
772 2008;190(7):2527-2536. doi:10.1128/JB.01756-07
- 773 26. Wargacki AJ, Leonard E, Win MN, et al. An Engineered Microbial Platform for Direct  
774 Biofuel Production from Brown Macroalgae. *Science.* Published online January 20, 2012.  
775 doi:10.1126/science.1214547
- 776 27. Zhang L, Li X, Zhang X, Li Y, Wang L. Bacterial alginate metabolism: an important pathway  
777 for bioconversion of brown algae. *Biotechnol Biofuels.* 2021;14(1):158. doi:10.1186/s13068-021-  
778 02007-8
- 779 28. Khan F, Tabassum N, Anand R, Kim YM. Motility of *Vibrio* spp.: regulation and controlling  
780 strategies. *Appl Microbiol Biotechnol.* 2020;104(19):8187-8208. doi:10.1007/s00253-020-10794-7
- 781 29. Echazarreta MA, Klose KE. *Vibrio* Flagellar Synthesis. *Front Cell Infect Microbiol.*  
782 2019;9:131. doi:10.3389/fcimb.2019.00131
- 783 30. Prouty MG, Correa NE, Klose KE. The novel sigma54- and sigma28-dependent flagellar gene  
784 transcription hierarchy of *Vibrio cholerae*. *Mol Microbiol.* 2001;39(6):1595-1609.  
785 doi:10.1046/j.1365-2958.2001.02348.x
- 786 31. Klose KE, Mekalanos JJ. Differential Regulation of Multiple Flagellins in *Vibrio cholerae*. *J*  
787 *Bacteriol.* 1998;180(2):303-316. doi:10.1128/JB.180.2.303-316.1998
- 788 32. Srivastava D, Hsieh ML, Khataokar A, Neiditch MB, Waters CM. Cyclic di-GMP inhibits  
789 *Vibrio cholerae* motility by repressing induction of transcription and inducing extracellular  
790 polysaccharide production. *Mol Microbiol.* 2013;90(6):1262-1276. doi:10.1111/mmi.12432
- 791 33. Kim SY, Thanh XTT, Jeong K, et al. Contribution of six flagellin genes to the flagellum  
792 biogenesis of *Vibrio vulnificus* and in vivo invasion. *Infect Immun.* 2014;82(1):29-42.  
793 doi:10.1128/iai.00654-13
- 794 34. Nedeljković M, Sastre DE, Sundberg EJ. Bacterial Flagellar Filament: A Supramolecular  
795 Multifunctional Nanostructure. *Int J Mol Sci.* 2021;22(14):7521. doi:10.3390/ijms22147521

- 796 35. Rajagopala SV, Titz B, Goll J, et al. The protein network of bacterial motility. *Mol Syst Biol.*  
797 2007;3(1):128. doi:10.1038/msb4100166
- 798 36. Ebrahimi A, Schwartzman J, Cordero OX. Cooperation and spatial self-organization  
799 determine rate and efficiency of particulate organic matter degradation in marine bacteria. *Proc*  
800 *Natl Acad Sci USA.* 2019;116(46):23309-23316. doi:10.1073/pnas.1908512116
- 801 37. Drescher K, Nadell CD, Stone HA, Wingreen NS, Bassler BL. Solutions to the Public Goods  
802 Dilemma in Bacterial Biofilms. *Current Biology.* 2014;24(1):50-55. doi:10.1016/j.cub.2013.10.030
- 803 38. Alcolombri U, Peaudecerf FJ, Fernandez VI, Behrendt L, Lee KS, Stocker R. Sinking  
804 enhances the degradation of organic particles by marine bacteria. *Nat Geosci.* 2021;14(10):775-  
805 780. doi:10.1038/s41561-021-00817-x
- 806 39. Yawata Y, Carrara F, Menolascina F, Stocker R. Constrained optimal foraging by marine  
807 bacterioplankton on particulate organic matter. *Proc Natl Acad Sci USA.* 2020;117(41):25571-  
808 25579. doi:10.1073/pnas.2012443117
- 809 40. McDougald D, Rice SA, Barraud N, Steinberg PD, Kjelleberg S. Should we stay or should we  
810 go: mechanisms and ecological consequences for biofilm dispersal. *Nat Rev Microbiol.*  
811 2012;10(1):39-50. doi:10.1038/nrmicro2695
- 812 41. Thomas F, Barbeyron T, Tonon T, Génicot S, Czjzek M, Michel G. Characterization of the  
813 first alginolytic operons in a marine bacterium: from their emergence in marine Flavobacteriia to  
814 their independent transfers to marine Proteobacteria and human gut Bacteroides: Emergence and  
815 transfer of alginolytic operons. *Environmental Microbiology.* 2012;14(9):2379-2394.  
816 doi:10.1111/j.1462-2920.2012.02751.x
- 817 42. Dudek M, Dieudonné A, Jouanneau D, et al. Regulation of alginate catabolism involves a  
818 GntR family repressor in the marine flavobacterium *Zobellia galactanivorans* DsijT. *Nucleic Acids*  
819 *Research.* 2020;48(14):7786-7800. doi:10.1093/nar/gkaa533
- 820 43. Guessous G, Patsalo V, Balakrishnan R, Çağlar T, Williamson JR, Hwa T. Inherited  
821 chitinases enable sustained growth and rapid dispersal of bacteria from chitin particles. *Nat*  
822 *Microbiol.* 2023;8(9):1695-1705. doi:10.1038/s41564-023-01444-5
- 823 44. Chubukov V, Gerosa L, Kochanowski K, Sauer U. Coordination of microbial metabolism.  
824 *Nat Rev Microbiol.* 2014;12(5):327-340. doi:10.1038/nrmicro3238
- 825 45. Martínez-Antonio A, Janga SC, Salgado H, Collado-Vides J. Internal-sensing machinery  
826 directs the activity of the regulatory network in *Escherichia coli*. *Trends in Microbiology.*  
827 2006;14(1):22-27. doi:10.1016/j.tim.2005.11.002
- 828 46. Bassler BL, Gibbons PJ, Yu C, Roseman S. Chitin utilization by marine bacteria. Chemotaxis  
829 to chitin oligosaccharides by *Vibrio furnissii*. *Journal of Biological Chemistry.*  
830 1991;266(36):24268-24275. doi:10.1016/S0021-9258(18)54224-1
- 831 47. Meibom KL, Li XB, Nielsen AT, Wu CY, Roseman S, Schoolnik GK. The *Vibrio cholerae*  
832 chitin utilization program. *Proc Natl Acad Sci USA.* 2004;101(8):2524-2529.  
833 doi:10.1073/pnas.0308707101
- 834 48. Mandel MJ, Schaefer AL, Brennan CA, et al. Squid-Derived Chitin Oligosaccharides Are a  
835 Chemotactic Signal during Colonization by *Vibrio fischeri*. *Appl Environ Microbiol.*  
836 2012;78(13):4620-4626. doi:10.1128/AEM.00377-12

- 837 49. Purcell EM. Life at low Reynolds number. *American Journal of Physics*. 1977;45(1):3-11.  
838 doi:10.1119/1.10903
- 839 50. Blackburn N, Fenchel T, Mitchell J. Microscale Nutrient Patches in Planktonic Habitats  
840 Shown by Chemotactic Bacteria. *Science*. 1998;282(5397):2254-2256.  
841 doi:10.1126/science.282.5397.2254
- 842 51. Blackburn N, Fenchel T. Influence of bacteria, diffusion and shear on micro-scale nutrient  
843 patches, and implications for bacterial chemotaxis. *Mar Ecol Prog Ser*. 1999;189:1-7.  
844 doi:10.3354/meps189001
- 845 52. Fenchel T. Microbial Behavior in a Heterogeneous World. *Science*. 2002;296(5570):1068-  
846 1071. doi:10.1126/science.1070118
- 847 53. Smriga S, Fernandez VI, Mitchell JG, Stocker R. Chemotaxis toward phytoplankton drives  
848 organic matter partitioning among marine bacteria. *Proc Natl Acad Sci USA*. 2016;113(6):1576-  
849 1581. doi:10.1073/pnas.1512307113
- 850 54. Ronce O. How Does It Feel to Be Like a Rolling Stone? Ten Questions About Dispersal  
851 Evolution. *Annu Rev Ecol Evol Syst*. 2007;38(1):231-253.  
852 doi:10.1146/annurev.ecolsys.38.091206.095611
- 853 55. Fenchel T. Motility of bacteria in sediments. *Aquat Microb Ecol*. 2008;51:23-30.  
854 doi:10.3354/ame01182
- 855 56. Rumbaugh KP, Sauer K. Biofilm dispersion. *Nat Rev Microbiol*. 2020;18(10):571-586.  
856 doi:10.1038/s41579-020-0385-0
- 857 57. Hehemann JH, Arevalo P, Datta MS, et al. Adaptive radiation by waves of gene transfer leads  
858 to fine-scale resource partitioning in marine microbes. *Nat Commun*. 2016;7:12860.  
859 doi:10.1038/ncomms12860
- 860 58. Tibbles BJ, Rawlings DE. Characterization of nitrogen-fixing bacteria from a temperate  
861 saltmarsh lagoon, including isolates that produce ethane from acetylene. *Microb Ecol*. 1994;27(1).  
862 doi:10.1007/BF00170115
- 863 59. D'Souza G, Waschina S, Pande S, Bohl K, Kaleta C, Kost C. Less is more: Selective  
864 advantages can explain the prevalent loss of biosynthetic genes in bacteria. *Evolution*.  
865 2014;68(9):2559-2570. doi:10.1111/evo.12468
- 866 60. Mathis R, Ackermann M. Response of single bacterial cells to stress gives rise to complex  
867 history dependence at the population level. *Proc Natl Acad Sci USA*. 2016;113(15):4224-4229.  
868 doi:10.1073/pnas.1511509113
- 869 61. Brettin T, Davis JJ, Disz T, et al. RASTtk: A modular and extensible implementation of the  
870 RAST algorithm for building custom annotation pipelines and annotating batches of genomes. *Sci*  
871 *Rep*. 2015;5(1):8365. doi:10.1038/srep08365
- 872 62. Kanehisa M, Sato Y, Morishima K. BlastKOALA and GhostKOALA: KEGG Tools for  
873 Functional Characterization of Genome and Metagenome Sequences. *Journal of Molecular*  
874 *Biology*. 2016;428(4):726-731. doi:10.1016/j.jmb.2015.11.006
- 875 63. Cheng D, Jiang C, Xu J, Liu Z, Mao X. Characteristics and applications of alginate lyases: A  
876 review. *International Journal of Biological Macromolecules*. 2020;164:1304-1320.  
877 doi:10.1016/j.ijbiomac.2020.07.199



- 878 64. Zhang H, Yohe T, Huang L, et al. dbCAN2: a meta server for automated carbohydrate-active  
879 enzyme annotation. *Nucleic Acids Res.* 2018;46(W1):W95-W101. doi:10.1093/nar/gky418
- 880 65. NCBI Resource Coordinators. Database resources of the National Center for Biotechnology  
881 Information. *Nucleic Acids Res.* 2016;44(Database issue):D7-D19. doi:10.1093/nar/gkv1290
- 882 66. Altschul SF, Gish W, Miller W, Myers EW, Lipman DJ. Basic local alignment search tool. *J*  
883 *Mol Biol.* 1990;215(3):403-410. doi:10.1016/S0022-2836(05)80360-2
- 884 67. Almagro Armenteros JJ, Tsirigos KD, Sønderby CK, et al. SignalP 5.0 improves signal  
885 peptide predictions using deep neural networks. *Nat Biotechnol.* 2019;37(4):420-423.  
886 doi:10.1038/s41587-019-0036-z
- 887 68. Juncker AS, Willenbrock H, von Heijne G, Brunak S, Nielsen H, Krogh A. Prediction of  
888 lipoprotein signal peptides in Gram-negative bacteria. *Protein Sci.* 2003;12(8):1652-1662.
- 889 69. Andrews S. FastQC: A Quality Control Tool for High Throughput Sequence Data [Online].  
890 Available online at: <http://www.bioinformatics.babraham.ac.uk/projects/fastqc/>. Published online  
891 2010. <http://www.bioinformatics.babraham.ac.uk/projects/fastqc/>
- 892 70. Bolger AM, Lohse M, Usadel B. Trimmomatic: a flexible trimmer for Illumina sequence data.  
893 *Bioinformatics.* 2014;30(15):2114-2120. doi:10.1093/bioinformatics/btu170
- 894 71. Langmead B, Salzberg SL. Fast gapped-read alignment with Bowtie 2. *Nat Methods.*  
895 2012;9(4):357-359. doi:10.1038/nmeth.1923
- 896 72. Danecek P, Bonfield JK, Liddle J, et al. Twelve years of SAMtools and BCFtools.  
897 *Gigascience.* 2021;10(2):giab008. doi:10.1093/gigascience/giab008
- 898 73. Liao Y, Smyth GK, Shi W. featureCounts: an efficient general purpose program for assigning  
899 sequence reads to genomic features. *Bioinformatics.* 2014;30(7):923-930.  
900 doi:10.1093/bioinformatics/btt656
- 901 74. Love MI, Huber W, Anders S. Moderated estimation of fold change and dispersion for RNA-  
902 seq data with DESeq2. *Genome Biology.* 2014;15(12):550. doi:10.1186/s13059-014-0550-8
- 903 75. Benjamini Y, Hochberg Y. Controlling the False Discovery Rate: A Practical and Powerful  
904 Approach to Multiple Testing. *Journal of the Royal Statistical Society: Series B (Methodological).*  
905 1995;57(1):289-300. doi:10.1111/j.2517-6161.1995.tb02031.x
- 906 76. Luo W, Brouwer C. Pathview: an R/Bioconductor package for pathway-based data integration  
907 and visualization. *Bioinformatics.* 2013;29(14):1830-1831. doi:10.1093/bioinformatics/btt285
- 908 77. Midani FS, Collins J, Britton RA. AMiGA: Software for Automated Analysis of Microbial  
909 Growth Assays. Silva-Rocha R, ed. *mSystems.* 2021;6(4):e00508-21.  
910 doi:10.1128/mSystems.00508-21

911
